# Supplementary material
Source: ML conference proceedings conference paper supplement (https://openaccess.thecvf.com/content/ICCV2025/html/Zeng_Visual-Oriented_Fine-Grained_Knowledge_ICCV_2025_paper.html)
Supplement: Supplementary file 1 [file Zeng_Visual-Oriented_Fine-Grained_Knowledge_ICCV_2025_supplemental.pdf]

# Visual-Oriented Fine-Grained Knowledge Editing for MultiModal Large Language Models

## Supplementary Material

### A. Experiments on more base models

We conducted experiments based on LLaVA-NeXT, the results are shown in Table 5.

|            | Specificity               | Reliability              | Locality                 | Generality               |
|------------|---------------------------|--------------------------|--------------------------|--------------------------|
| FT-LLM     | 21.82                     | 84.0                     | 82.91                    | 84.0                     |
| FT-Visual  | 19.32                     | 85.71                    | 100.0                    | 84.63                    |
| IKE        | 24.56                     | 99.93                    | 56.80                    | 85.35                    |
| SERAC      | 31.42                     | 98.60                    | 100.0                    | 95.96                    |
| MSCKE      | 52.23( $\uparrow 20.81$ ) | 99.92( $\uparrow 1.32$ ) | 100.0( $\uparrow 0.00$ ) | 97.16( $\uparrow 1.20$ ) |
| MEND       | 65.43                     | 96.90                    | 96.87                    | 96.54                    |
| MSCKE-MEND | 67.86( $\uparrow 2.43$ )  | 97.60( $\uparrow 0.70$ ) | 100.0( $\uparrow 3.13$ ) | 96.58( $\uparrow 0.04$ ) |

Table 5. Experiments on LLaVA-NeXT-7b.

### B. Analysis on Similarity Threshold

In Eq. 3, we set the similarity threshold between the base model and the counterfactual model to 0.5. To evaluate the effect of this threshold on classifier accuracy, we conducted an experiment, with the results presented in Fig. 3. The experimental results show that our classifier is insensitive to the threshold, and only when the threshold is set too high or too low will the classifier performance significantly decrease.

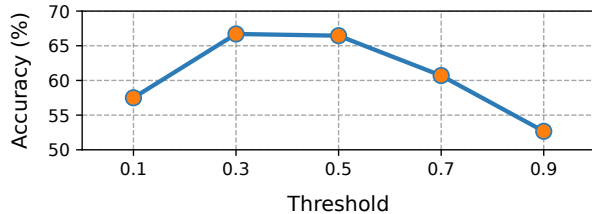

Figure 6. Classifier accuracy under different thresholds.

### C. Computational Cost Analysis

The MSCKE framework comprises a multimodal scope classifier, a base model, and a counterfactual model. We evaluate the computational cost of these components in terms of inference time and memory usage. The results on BLIP-2 OPT are shown in Table 6.

Our analysis shows that the multimodal scope classifier requires significantly less inference time and memory compared to the base model. These findings highlight that the classifier introduces minimal computational overhead while playing a crucial role in improving editing performance. Its

lightweight design ensures that it does not become a bottleneck, making the MSCKE framework well-suited for real-world applications where computational resources may be limited.

|                | inference time | parameter size |
|----------------|----------------|----------------|
| classifier     | 36ms           | 427.62M        |
| base           | 121ms          | 3.8B           |
| counterfactual | 85ms           | 1.2B           |

Table 6. Comparison of inference time and parameter size among the multimodal scope classifier, base model, and counterfactual model on BLIP-2 OPT.

| Components            | CLIP-ViT-B/32 | CLIP-ViT-L/14 |
|-----------------------|---------------|---------------|
| concatenation         | 63.70         | 63.80         |
| cross-attention       | 64.45         | 64.35         |
| dot-product attention | <b>64.73</b>  | <b>64.85</b>  |

Table 7. Implementation analysis of multimodal scope classifier. The accuracy of the classifier is displayed. Using CLIP-ViT-B/32 for feature extraction, coupled with dot-product attention for feature fusion, yields strong performance.

### D. Implementation Analysis of Multimodal Scope Classifier

The multimodal scope classifier consists of two key components: a feature extraction module and a feature fusion module. We investigate how different implementations of these modules impact the classifier’s performance. The feature extraction module can be implemented using either CLIP-ViT-B/32 or CLIP-ViT-L/14, while the feature fusion module can be realized through feature concatenation, cross-attention, or dot-product attention. The results of scope classifier on FGVEEdit dataset are shown in Table 7. Regarding feature fusion, dot-product attention delivers the best performance with minimal computational overhead. Its superior efficiency in capturing essential interactions between text and image features, without the complexity of methods like cross-attention, makes it an ideal choice for feature fusion in our multimodal classifier.

For feature extraction, CLIP-ViT-B/32 performs similarly to CLIP-ViT-L/14, suggesting that CLIP-ViT-B/32 is sufficient for extracting comprehensive features. Additionally, we selected the more powerful SigLIP as the feature extractor for experimentation. The results are presented in

|                    | BLIP-2 OPT  |             |          |            | MiniGPT-4   |             |          |            |
|--------------------|-------------|-------------|----------|------------|-------------|-------------|----------|------------|
|                    | Specificity | Reliability | Locality | Generality | Specificity | Reliability | Locality | Generality |
| MSCKE(clip)        | 61.60       | 99.13       | 100.0    | 98.56      | 57.20       | 99.50       | 100.0    | 93.00      |
| MSCKE(siglip)      | 61.71       | 99.71       | 100.0    | 99.11      | 57.38       | 99.68       | 100.0    | 93.56      |
| MSCKE-MEND(clip)   | 68.38       | 97.40       | 100.0    | 96.50      | 71.98       | 97.05       | 100.0    | 96.70      |
| MSCKE-MEND(siglip) | 68.42       | 97.95       | 100.0    | 96.72      | 72.21       | 97.65       | 100.0    | 97.21      |

Table 8. Experiments on siglip.

|               |                    | EDITING VQA   |                |              |              | EDITING IMAGE CAPTION |                |              |              |
|---------------|--------------------|---------------|----------------|--------------|--------------|-----------------------|----------------|--------------|--------------|
| Method        |                    | Reliability ↑ | T-Generality ↑ | T-Locality ↑ | M-Locality ↑ | Reliability ↑         | T-Generality ↑ | T-Locality ↑ | M-Locality ↑ |
| BLIP-2 OPT    |                    |               |                |              |              |                       |                |              |              |
| Size:3.8B     |                    |               |                |              |              |                       |                |              |              |
| Base Methods  | Base Model         | 0.00          | 0.00           | 100.0        | 100.0        | 0.00                  | 0.00           | 100.0        | 100.0        |
|               | FT(vision block)   | 60.56         | 49.79          | 100.0        | 8.47         | 18.94                 | 5.86           | 100.0        | 8.40         |
|               | FT(last layer)     | 57.66         | 46.70          | 21.67        | 3.06         | 16.60                 | 3.50           | 24.96        | 7.12         |
| Model Editing | Knowledge Editor   | 85.28         | 84.23          | 90.31        | 52.48        | 0.30                  | 0.10           | 88.31        | 49.52        |
|               | In-Context Editing | 99.71         | 91.59          | 48.79        | 2.53         | 83.80                 | 69.40          | 48.95        | 2.95         |
|               | SERAC              | 99.90         | 99.90          | 100.0        | 2.91         | 98.90                 | 98.90          | 99.98        | 7.52         |
|               | MSCKE              | 99.80         | 95.60          | 100.0        | 98.08        | 97.20                 | 97.40          | 100.0        | 99.34        |
|               | MEND               | 98.51         | 97.51          | 99.94        | 96.65        | 80.00                 | 78.10          | 94.54        | 70.84        |
|               | MSCKE-MEND         | 98.20         | 92.10          | 100.0        | 99.23        | 80.10                 | 78.70          | 100.0        | 99.33        |
| MiniGPT-4     |                    |               |                |              |              |                       |                |              |              |
| Size:7.3B     |                    |               |                |              |              |                       |                |              |              |
| Base Methods  | Base Model         | 0.00          | 0.00           | 100.0        | 100.0        | 0.00                  | 0.00           | 100.0        | 100.0        |
|               | FT(vision block)   | 36.3          | 0.3            | 100.0        | 9.29         | 3.10                  | 0.00           | 100.0        | 8.56         |
|               | FT(last layer)     | 0.10          | 0.00           | 72.60        | 15.75        | 0.00                  | 0.00           | 53.50        | 12.68        |
| Model Editing | Knowledge Editor   | 95.37         | 92.64          | 97.31        | 73.76        | 75.50                 | 67.80          | 97.15        | 69.92        |
|               | In-Context Editing | 100.0         | 94.40          | 50.30        | 3.67         | 77.00                 | 51.80          | 52.18        | 4.68         |
|               | SERAC              | 99.90         | 92.60          | 99.90        | 5.52         | 97.30                 | 74.60          | 99.89        | 7.20         |
|               | MSCKE              | 99.90         | 92.60          | 100.0        | 84.12        | 98.60                 | 88.90          | 100.0        | 99.80        |
|               | MEND               | 96.20         | 95.40          | 98.23        | 81.08        | 80.80                 | 78.60          | 98.41        | 75.25        |
|               | MSCKE-MEND         | 97.40         | 92.50          | 100.0        | 99.74        | 82.0                  | 80.70          | 100.0        | 99.83        |

Table 9. Main results on the MMEdit. T-Locality, M-Locality refer to the textual and multimodal stability. T-Generality represents textual generality. Reliability denotes the Exact Match of successful editing.

Table 8. Experiments demonstrate that the stronger feature extractor did not lead to significant performance improvements. This finding highlights that our classifier does not require the more computationally expensive CLIP-ViT-L/14, making the approach more efficient and suitable for practical applications with limited computational resources.

## E. Experimental Results on Other Benchmark

We also conducted experiments on MMEdit, and the results are shown in Table 9. All baseline results come from MMEdit. The findings demonstrate that our method achieves strong performance on MMEdit as well.

## F. Dataset Examples

More examples of our dataset are shown in Fig. 7 and Fig. 8.

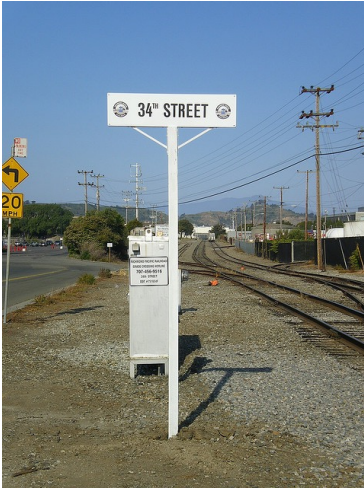

#### **Editing Sample**

**Q:** What is the name of the street?

**A:** 34th street

#### **Out-of-Visual-Scope**

**Q:** Which side of the sign is the road on?

**A:** left

#### **In-Visual-Scope**

**Q:** What do the two white signs say?

**A:** 34th street

#### **Generality**

**Q:** Can you tell me the name of the street?

**A:** 34th street

#### **Locality**

**Q:** who sings the song middle finger in the air?

**A:** Cobra Starship

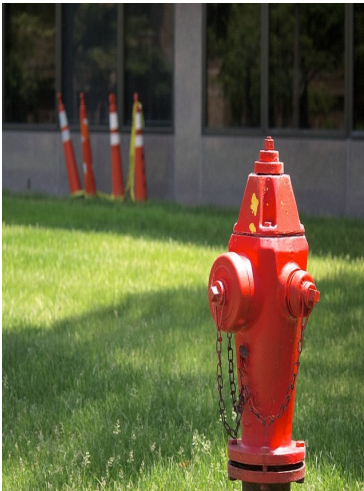

#### **Editing Sample**

**Q:** What is the color of the hydrant?

**A:** red

#### **Out-of-Visual-Scope**

**Q:** How many different colors does the cone have?

**A:** 2

#### **In-Visual-Scope**

**Q:** Is the fire hydrant the same color as Christmas?

**A:** yes

#### **Generality**

**Q:** What hue is the fire hydrant?

**A:** red

#### **Locality**

**Q:** who wrote and sang ground control to major tom?

**A:** David Bowie

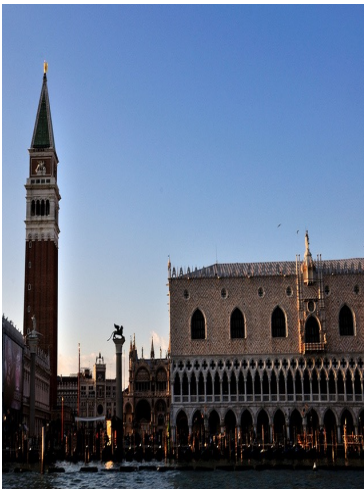

#### **Editing Sample**

**Q:** Is there water in the picture?

**A:** yes

#### **Out-of-Visual-Scope**

**Q:** Is the sky clear?

**A:** yes

#### **In-Visual-Scope**

**Q:** What is in front of the buildings?

**A:** water

#### **Generality**

**Q:** Does the image contain any water?

**A:** yes

#### **Locality**

**Q:** when did the development of nuclear science begin

**A:** 1898

Figure 7. Some examples of our dataset.

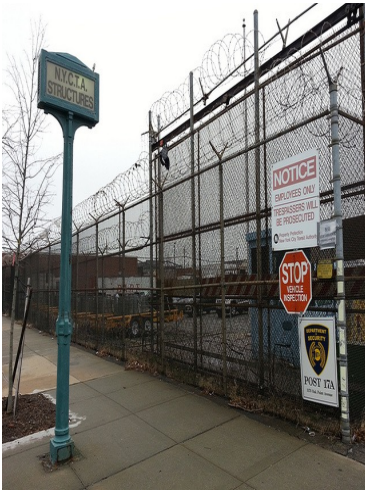

#### Editing Sample

**Q:** What is the sign seen?

**A:** stop

#### Out-of-Visual-Scope

**Q:** What shape is the majority?

**A:** square

#### In-Visual-Scope

**Q:** What does it say above stop?

**A:** notice

#### Generality

**Q:** What is the displayed sign?

**A:** stop

#### Locality

**Q:** where are kia's made in the us?

**A:** West Point, Georgia

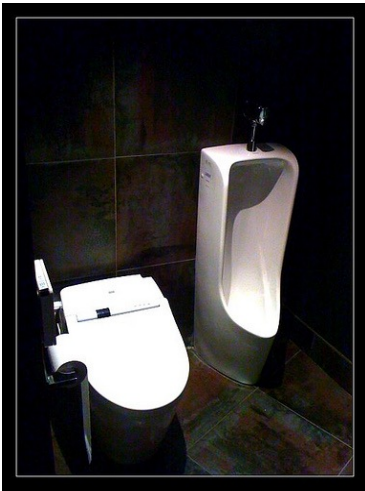

#### Editing Sample

**Q:** How many urinals can you see?

**A:** 1

#### Out-of-Visual-Scope

**Q:** Is this room well lit?

**A:** no

#### In-Visual-Scope

**Q:** Which of these objects is a urinal?

**A:** right

#### Generality

**Q:** What is the total number of urinals visible?

**A:** 1

#### Locality

**Q:** where did clay matthews jr play college football?

**A:** University of Southern California

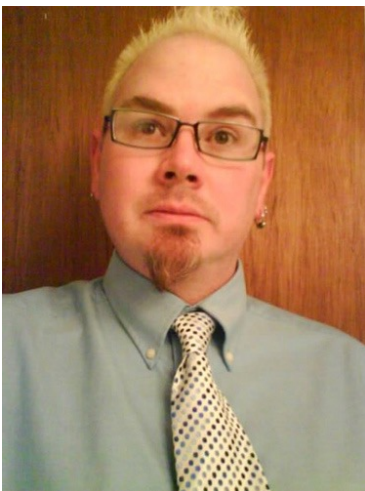

#### Editing Sample

**Q:** Is this man wearing a necktie?

**A:** yes

#### Out-of-Visual-Scope

**Q:** How many earrings does the guy have in his ear?

**A:** 1

#### In-Visual-Scope

**Q:** How many dots on the necktie?

**A:** 50

#### Generality

**Q:** Does this man have a necktie on?

**A:** yes

#### Locality

**Q:** when do casey and cappie get back together?

**A:** Legacy

Figure 8. Some examples of our dataset.
